# Supplementary material for: How personality shapes perceptions of adulthood
Source: Research Square preprint supplement (doi:10.21203/rs.3.rs-6700736/v1), 2025-06-09
Supplement: Supplementary file 1 [file 52f186ea111a3fb0f68414f7.docx]

**How personality shapes perceptions of adulthood**

Dr Megan Wright

Department of Education, University of York, Heslington, York, UK, YO10 5DD

**Supplementary Materials**

**Table of Contents**

[Correlation Results 2](#_Toc195607876)

[Table S1. Correlation matrix for variables included in the study 2](#_Toc195607877)

[Regression Tables 3](#_Toc195607878)

[Table S2. Subjective adult status 3](#_Toc195607879)

[Table S3. Attitudes towards adulthood 4](#_Toc195607880)

[Table S4. MoA Independence 5](#_Toc195607881)

[Table S5. MoA Legality Markers 6](#_Toc195607882)

[Table S6. MoA Relative Maturity 7](#_Toc195607883)

[Table S7. MoA Role Transitions 8](#_Toc195607884)

[Table S8. CARES Cognitive Maturity 9](#_Toc195607885)

[Table S9. CARES Sense of Aging 10](#_Toc195607886)

[Table S10. CARES Self Reliance 11](#_Toc195607887)

[Table S11. CARES Eudaimonia 12](#_Toc195607888)

[Table S12. CARES Social Convoy 13](#_Toc195607889)

# Correlation Results

## Table S1. Correlation matrix for variables included in the study

|  |  | 1 | 2 | 3 | 4 | 5 | 6 | 7 | 8 | 9 | 10 | 11 | 12 | 13 | 14 | 15 | 16 | 17 | 18 | 19 |
| --- | --- | --- | --- | --- | --- | --- | --- | --- | --- | --- | --- | --- | --- | --- | --- | --- | --- | --- | --- | --- |
| 1 | Age | – |  |  |  |  |  |  |  |  |  |  |  |  |  |  |  |  |  |  |
| 2 | Gender | **-0.11** | – |  |  |  |  |  |  |  |  |  |  |  |  |  |  |  |  |  |
| 3 | Highest Education | -0.04 | 0.01 | – |  |  |  |  |  |  |  |  |  |  |  |  |  |  |  |  |
| 4 | Income | **0.24** | -0.06 | **0.09** | – |  |  |  |  |  |  |  |  |  |  |  |  |  |  |  |
| 5 | Neuroticism | **-0.35** | **0.17** | **-0.10** | **-0.16** | – |  |  |  |  |  |  |  |  |  |  |  |  |  |  |
| 6 | Extraversion | **-0.08** | **0.10** | **0.11** | **0.10** | **-0.39** | – |  |  |  |  |  |  |  |  |  |  |  |  |  |
| 7 | Openness | 0.06 | -0.01 | **0.20** | -0.05 | 0.05 | 0.04 | – |  |  |  |  |  |  |  |  |  |  |  |  |
| 8 | Agreeableness | **0.22** | **0.15** | 0.05 | 0.04 | **-0.28** | **0.32** | 0.07 | – |  |  |  |  |  |  |  |  |  |  |  |
| 9 | Conscientiousness | **0.12** | 0.04 | 0.06 | **0.13** | **-0.47** | **0.27** | **-0.08** | **0.21** | – |  |  |  |  |  |  |  |  |  |  |
| 10 | Subjective Adult Status | **0.38** | -0.04 | **0.09** | **0.26** | **-0.46** | **0.19** | -0.05 | **0.21** | **0.42** | – |  |  |  |  |  |  |  |  |  |
| 11 | Attitudes towards adulthood | **0.29** | -0.07 | **0.18** | **0.13** | **-0.56** | **0.37** | 0.06 | **0.32** | **0.34** | **0.44** | – |  |  |  |  |  |  |  |  |
| 12 | MoA independence | **-0.09** | **0.09** | 0.00 | 0.06 | 0.03 | **0.17** | **-0.15** | 0.06 | **0.16** | **0.08** | 0.05 | – |  |  |  |  |  |  |  |
| 13 | MoA legality markers | -0.06 | -0.01 | -0.04 | 0.03 | -0.02 | **0.18** | **-0.12** | 0.03 | **0.11** | **0.09** | **0.13** | **0.55** | – |  |  |  |  |  |  |
| 14 | MoA relative maturity | 0.02 | -0.01 | 0.07 | 0.05 | **-0.09** | **0.18** | **0.19** | **0.11** | **0.13** | **0.15** | **0.23** | **0.33** | **0.32** | – |  |  |  |  |  |
| 15 | MoA role transitions | 0.05 | 0.00 | -0.05 | 0.06 | -0.02 | **0.23** | **-0.14** | **0.09** | **0.11** | **0.11** | **0.09** | **0.61** | **0.48** | **0.17** | – |  |  |  |  |
| 16 | CARES cognitive maturity | -0.01 | 0.07 | 0.02 | -0.02 | **-0.09** | **0.20** | 0.09 | **0.14** | **0.23** | **0.13** | **0.19** | **0.48** | **0.36** | **0.63** | **0.31** | – |  |  |  |
| 17 | CARES sense of aging | 0.07 | 0.02 | -0.04 | 0.05 | -0.03 | **0.14** | 0.07 | **0.15** | **0.13** | **0.08** | **0.15** | **0.41** | **0.38** | **0.50** | **0.37** | **0.64** | – |  |  |
| 18 | CARES self-reliance | -0.04 | **0.10** | -0.02 | -0.01 | -0.06 | **0.16** | 0.03 | **0.12** | **0.21** | **0.15** | **0.19** | **0.53** | **0.39** | **0.58** | **0.27** | **0.78** | **0.61** | – |  |
| 19 | CARES eudaimonia | **-0.09** | **0.17** | -0.02 | -0.01 | -0.06 | **0.24** | 0.06 | **0.10** | **0.19** | **0.07** | **0.19** | **0.35** | **0.34** | **0.59** | **0.21** | **0.74** | **0.63** | **0.75** | – |
| 20 | CARES social convoy | **-0.13** | **0.18** | 0.00 | -0.01 | 0.02 | **0.32** | 0.00 | **0.10** | **0.14** | 0.01 | **0.13** | **0.40** | **0.37** | **0.52** | **0.32** | **0.66** | **0.64** | **0.62** | **0.79** |

*Note: Correlations in bold indicate statistical significance (p <.05)*

# Regression Tables

Note: All regression tables show results from hierarchical models 1 (age, gender, and SES measures), 2 (age, gender, SES measures, and social roles), and 3 (age, gender, SES measures, social roles, and personality)

## Table S2. Subjective adult status

|  | Model 1 | | | | | Model 2 | | | | | Model 3 | | | | |
| --- | --- | --- | --- | --- | --- | --- | --- | --- | --- | --- | --- | --- | --- | --- | --- |
|  | *β* | SE | 95% CI% | *t* | *p* | *β* | SE | 95% CI% | *t* | *p* | *β* | SE | 95% CI% | *t* | *p* |
| Intercept | - | .169 | [2.054, 2.609] | 13.831 | <.001 | - | .178 | [1.867, 2.453] | 12.140 | <.001 | - | .343 | [1.394, 2.525] | 5.708 | <.001 |
| Age | **.345** | .002 | [.017, .024] | 9.816 | <.001 | **.280** | .002 | [.013, .021] | 7.174 | <.001 | **.189** | .002 | [.007, .015] | 4.832 | <.001 |
| Gender (female) | .004 | .054 | [-.083, .095] | 0.115 | .908 | -.015 | .054 | [-.112, .065] | -0.439 | .660 | -.006 | .050 | [-.093, .073] | -0.201 | .841 |
| Highest education | **.089** | .026 | [.025, .111] | 2.605 | .009 | **.099** | .026 | [.033, .119] | 2.906 | .004 | **.068** | .241 | [.012, .092] | 2.157 | .031 |
| Log income | **.173** | .012 | [.038, .076] | 4.932 | <.001 | **.147** | .012 | [.030, .068] | 4.202 | <.001 | **.106** | .010 | [.018, .052] | 3.350 | .001 |
| Relationship status (married) |  |  |  |  |  | .047 | .060 | [-.018, .178] | 13.41 | .180 | .040 | .054 | [-.020, .156] | 1.268 | .205 |
| Parent status (parent) |  |  |  |  |  | **.179** | .058 | [.187, .379] | 4.853 | <.001 | **.166** | .054 | [.173, .350] | 4.880 | <.001 |
| Employment status (full-time) |  |  |  |  |  | -.058 | .086 | [-.286, -.001] | -1.661 | .097 | -.043 | .078 | [-.236, .020] | -1.388 | .166 |
| Neuroticism |  |  |  |  |  |  |  |  |  |  | **-.204** | .039 | [-.262, -.134] | -5.096 | <.001 |
| Extraversion |  |  |  |  |  |  |  |  |  |  | .004 | .043 | [-.066, .075] | 0.101 | .920 |
| Openness |  |  |  |  |  |  |  |  |  |  | -.025 | .033 | [-.081, .029] | -0.789 | .430 |
| Agreeableness |  |  |  |  |  |  |  |  |  |  | .025 | .047 | [-.042, .114] | 0.757 | .449 |
| Conscientiousness |  |  |  |  |  |  |  |  |  |  | **.268** | .042 | [.259, .399] | 7.752 | <.001 |
| Model *R2* | .180 | | | | | .208 | | | | | .364 | | | | |
| F(4,709) | 40.220 | | | | | 27.700 | | | | | 35.030 | | | | |
| *p* | < .001 | | | | | <.001 | | | | | <.00§ | | | | |

*Note: β = standardised beta coefficient*

## Table S3. Attitudes towards adulthood

|  | Model 1 | | | | | Model 2 | | | | | Model 3 | | | | |
| --- | --- | --- | --- | --- | --- | --- | --- | --- | --- | --- | --- | --- | --- | --- | --- |
|  | *β* | SE | 95% CI% | *t* | *p* | *β* | SE | 95% CI% | *t* | *p* | *β* | SE | 95% CI% | *t* | *p* |
| Intercept | - | .194 | [1.943, 2.581] | 11.685 | <.001 | - | .208 | [1.893, 2.577] | 10.762 | <.001 | - | .373 | [1.674, 2.901] | 6.140 | <.001 |
| Age | **.282** | .002 | [.015, .023] | 7.746 | <.001 | **.253** | .003 | [.012, .021] | 6.151 | <.001 | **.131** | .003 | [.005, .013] | 3.427 | .001 |
| Gender (female) | -.035 | .062 | [-.163, .041] | -0.985 | .325 | -.039 | .063 | [-.172, .034] | -1.100 | .272 | -.025 | .054 | [-.134, .045] | -0.813 | .417 |
| Highest education | **.189** | .030 | [.111, .209] | 5.334 | <.001 | **.189** | .031 | [.110, .211] | 5.262 | <.001 | **.116** | .026 | [.055, .141] | 3.752 | <.001 |
| Log income | .048 | .013 | [-.004, .039] | 1.320 | .187 | .037 | .013 | [-.009, .036] | 1.014 | .311 | -.000 | .011 | [-.019, .019] | -0.005 | .996 |
| Relationship status (married) |  |  |  |  |  | .006 | .070 | [-.104, .125] | 0.157 | .875 | -.030 | .058 | [-.153, .039] | -0.976 | .330 |
| Parent status (parent) |  |  |  |  |  | .062 | .068 | [-.004, .220] | 1.583 | .114 | .004 | .058 | [-.089, .102] | 0.112 | .911 |
| Employment status (full-time) |  |  |  |  |  | -.043 | .101 | [-.285, .046] | -1.186 | .236 | -.004 | .084 | [-.149, .128] | -0.126 | .900 |
| Neuroticism |  |  |  |  |  |  |  |  |  |  | **-.367** | .042 | [-.464, -.325] | -9.361 | <.001 |
| Extraversion |  |  |  |  |  |  |  |  |  |  | **.175** | .046 | [.153, .305] | 4.946 | <.001 |
| Openness |  |  |  |  |  |  |  |  |  |  | .042 | .036 | [-.010, .109] | 1.362 | .174 |
| Agreeableness |  |  |  |  |  |  |  |  |  |  | **.110** | .051 | [.088, .257] | 3.351 | .001 |
| Conscientiousness |  |  |  |  |  |  |  |  |  |  | **.078** | .046 | [.030, .182] | 2.303 | .022 |
| Model *R2* | .120 | | | | | .121 | | | | | .390 | | | | |
| F(4,709) | 25.310 | | | | | 15.030 | | | | | 39.050 | | | | |
| *p* | <.001 | | | | | <.001 | | | | | <.001 | | | | |

*Note: β = standardised beta coefficient*

## Table S4. MoA Independence

|  | Model 1 | | | | | Model 2 | | | | | Model 3 | | | | |
| --- | --- | --- | --- | --- | --- | --- | --- | --- | --- | --- | --- | --- | --- | --- | --- |
|  | *β* | SE | 95% CI% | *t* | *p* | *β* | SE | 95% CI% | *t* | *p* | *β* | SE | 95% CI% | *t* | *p* |
| Intercept | - | .168 | [3.119, 3.673] | 20.210 | <.001 | - | .180 | [2.971, 3.563] | 18.184 | <.001 | - | .375 | [1.253, 2.487] | 4.990 | <.001 |
| Age | **-.106** | .002 | [-.009, -.002] | -2.761 | .006 | **-.151** | .002 | [-.012, -.004] | -3.487 | .001 | -.075 | .003 | [-.008, .000] | -1.607 | .108 |
| Gender (female) | .081 | .054 | [.029, .206] | 2.179 | .030 | .068 | .054 | [.008, .187] | 1.802 | .072 | .016 | .055 | [-.067, .114] | 0.431 | .666 |
| Highest education | -.015 | .026 | [-.053, .033] | -0.396 | .692 | -.002 | .026 | [-.045, .042] | -0.053 | .958 | .017 | .026 | [-.031, .055] | 0.455 | .650 |
| Log income | **.093** | .012 | [.009, .047] | 2.409 | .016 | **.081** | .012 | [.005, .044] | 2.084 | .037 | .047 | .011 | [-.005, .033] | 1.241 | .215 |
| Relationship status (married) |  |  |  |  |  | .009 | .060 | [-.085, .114] | 0.242 | .809 | .010 | .059 | [-.080, .113] | 0.277 | .782 |
| Parent status (parent) |  |  |  |  |  | **.122** | .059 | [.078, .272] | 2.970 | .003 | **.089** | .059 | [.031, .224] | 2.183 | .029 |
| Employment status (full-time) |  |  |  |  |  | -.005 | .087 | [-.154, .133] | -0.124 | .902 | .003 | .085 | [-.133, .146] | 0.074 | .941 |
| Neuroticism |  |  |  |  |  |  |  |  |  |  | **.186** | .042 | [.095, .234] | 3.879 | <.001 |
| Extraversion |  |  |  |  |  |  |  |  |  |  | **.161** | .047 | [.096, .250] | 3.712 | <.001 |
| Openness |  |  |  |  |  |  |  |  |  |  | **-.136** | .037 | [-.192, -.072] | -3.624 | <.001 |
| Agreeableness |  |  |  |  |  |  |  |  |  |  | .028 | .052 | [-.049, .122] | 0.709 | .479 |
| Conscientiousness |  |  |  |  |  |  |  |  |  |  | **.180** | .046 | [.125, .277] | 4.340 | <.001 |
| Model *R2* | .017 | | | | | .025 | | | | | .085 | | | | |
| F(4,709) | 4.102 | | | | | 3.626 | | | | | 6.553 | | | | |
| *p* | .003 | | | | | .001 | | | | | <.001 | | | | |

*Note: β = standardised beta coefficient*

## Table S5. MoA Legality Markers

|  | Model 1 | | | | | Model 2 | | | | | Model 3 | | | | |
| --- | --- | --- | --- | --- | --- | --- | --- | --- | --- | --- | --- | --- | --- | --- | --- |
|  | *β* | SE | 95% CI% | *t* | *p* | *β* | SE | 95% CI% | *t* | *p* | *β* | SE | 95% CI% | *t* | *p* |
| Intercept | - | .161 | [2.695, 3.226] | 18.382 | <.001 | - | .173 | [2.693, 3.263] | 17.197 | <.001 | - | .363 | [1.397, 2.593] | 5.497 | <.001 |
| Age | -.075 | .002 | [-.007, -.001] | -1.944 | .052 | **-.090** | .002 | [-.008, -.001] | -2.043 | .041 | -.012 | .002 | [-.005, .003] | -0.248 | .805 |
| Gender (female) | -.014 | .052 | [-.104, .065] | -0.380 | .704 | -.013 | .052 | [-.104, .068] | -0.340 | .734 | -.051 | .053 | [-.157, .018] | -1.304 | .193 |
| Highest education | -.045 | .025 | [-.071, .011] | -1.206 | .228 | -.044 | .025 | [-.071, .013] | -1.137 | .256 | -.036 | .025 | [-.066, .018] | -0.936 | .349 |
| Log income | .050 | .011 | [-.004, .032] | 1.291 | .197 | .052 | .011 | [-.004, .033] | 1.323 | .186 | .018 | .011 | [-.013, .023] | 0.457 | .648 |
| Relationship status (married) |  |  |  |  |  | -.035 | .058 | [-.148, .043] | -0.902 | .368 | -.043 | .057 | [-.157, .030] | -1.124 | .261 |
| Parent status (parent) |  |  |  |  |  | .009 | .057 | [-.082, .105] | 0.206 | .837 | -.038 | .057 | [-.146, .041] | -0.921 | .357 |
| Employment status (full-time) |  |  |  |  |  | -.005 | .084 | [-.149, .127] | -0.132 | .895 | .007 | .082 | [-.119, .151] | 0.196 | .845 |
| Neuroticism |  |  |  |  |  |  |  |  |  |  | **.122** | .041 | [.034, .170] | 2.485 | .013 |
| Extraversion |  |  |  |  |  |  |  |  |  |  | **.222** | .045 | [.152, .301] | 5.018 | <.001 |
| Openness |  |  |  |  |  |  |  |  |  |  | **-.116** | .035 | [-.166, -.049] | -3.044 | .002 |
| Agreeableness |  |  |  |  |  |  |  |  |  |  | -.003 | .050 | [-.086, .079] | -0.062 | .951 |
| Conscientiousness |  |  |  |  |  |  |  |  |  |  | **.107** | .045 | [.039, .187] | 2.525 | .012 |
| Model *R2* | .003 | | | | | -.001 | | | | | .052 | | | | |
| F(4,709) | 1.407 | | | | | 0.927 | | | | | 4.256 | | | | |
| *p* | .230 | | | | | .485 | | | | | <.001 | | | | |

*Note: β = standardised beta coefficient*

## Table S6. MoA Relative Maturity

|  | Model 1 | | | | | Model 2 | | | | | Model 3 | | | | |
| --- | --- | --- | --- | --- | --- | --- | --- | --- | --- | --- | --- | --- | --- | --- | --- |
|  | *β* | SE | 95% CI% | *t* | *p* | *β* | SE | 95% CI% | *t* | *p* | *β* | SE | 95% CI% | *t* | *p* |
| Intercept | - | .167 | [3.038, 3.588] | 19.817 | <.001 | - | .179 | [3.128, 3.718] | 19.102 | <.001 | - | .373 | [1.327, 2.555] | 5.206 | <.001 |
| Age | .009 | .002 | [-.003, .004] | 0.239 | .811 | .032 | .002 | [-.002, .006] | 0.730 | .466 | .018 | .003 | [-.003, .005] | 0.371 | .711 |
| Gender (female) | -.007 | .053 | [-.099, .078] | -0.196 | .844 | .001 | .054 | [-.087, .091] | 0.039 | .969 | -.027 | .055 | [-.128, .052] | -0.697 | .486 |
| Highest education | .062 | .026 | [-.000, .085] | 1.646 | .100 | .046 | .026 | [-.012, .075] | 1.193 | .233 | -.010 | .026 | [-.050, .036] | -0.269 | .788 |
| Log income | .041 | .011 | [-.007, .031] | 1.065 | .287 | .038 | .012 | [-.008, .030] | 0.958 | .338 | .031 | .011 | [-.010, .028] | 0.809 | .419 |
| Relationship status (married) |  |  |  |  |  | .027 | .060 | [-.057, .141] | 0.698 | .485 | .014 | .058 | [-.075, .117] | 0.368 | .713 |
| Parent status (parent) |  |  |  |  |  | -.064 | .059 | [-.187, .006] | -1.537 | .125 | -.068 | .058 | [-.193, -.001] | -1.665 | .096 |
| Employment status (full-time) |  |  |  |  |  | -.057 | .057 | [-.270, .017] | -1.457 | .146 | -.044 | .084 | [-.237, .041] | -1.167 | .244 |
| Neuroticism |  |  |  |  |  |  |  |  |  |  | .029 | .042 | [-.044, .095] | 0.598 | .550 |
| Extraversion |  |  |  |  |  |  |  |  |  |  | **.144** | .046 | [.076, .228] | 3.280 | .001 |
| Openness |  |  |  |  |  |  |  |  |  |  | **.189** | .036 | [.120, .240] | 4.961 | <.001 |
| Agreeableness |  |  |  |  |  |  |  |  |  |  | .039 | .051 | [-.036, .134] | 0.954 | .340 |
| Conscientiousness |  |  |  |  |  |  |  |  |  |  | **.109** | .046 | [.045, .196] | 2.614 | .009 |
| Model *R2* | .001 | | | | | .004 | | | | | .070 | | | | |
| F(4,709) | 1.130 | | | | | 1.403 | | | | | 5.503 | | | | |
| *p* | .341 | | | | | .201 | | | | | <.001 | | | | |

*Note: β = standardised beta coefficient*

## Table S7. MoA Role Transitions

|  | Model 1 | | | | | Model 2 | | | | | Model 3 | | | | |
| --- | --- | --- | --- | --- | --- | --- | --- | --- | --- | --- | --- | --- | --- | --- | --- |
|  | *β* | SE | 95% CI% | *t* | *p* | *β* | SE | 95% CI% | *t* | *p* | *β* | SE | 95% CI% | *t* | *p* |
| Intercept | - | .216 | [2.317, 3.028] | 12.388 | <.001 | - | .215 | [1.823, 2.530] | 10.146 | <.001 | - | .445 | [-.460, 1.006] | 0.613 | .540 |
| Age | .039 | .003 | [-.002, .007] | 1.012 | .312 | **-.134** | .003 | [-.014, -.005] | -3.298 | .001 | -.038 | .003 | [-.008, .002] | -0.865 | .387 |
| Gender (female) | .007 | .069 | [-.101, .126] | 0.185 | .854 | -.035 | .065 | [-.171, .042] | -1.003 | .316 | **-.091** | .065 | [-.274, -.059] | -2.551 | .011 |
| Highest education | -.051 | .033 | [-.100, .010] | -1.355 | .176 | -.007 | .032 | [-.058, .046] | -0.197 | .844 | .006 | .031 | [-.046, .057] | 0.163 | .871 |
| Log income | .053 | .015 | [-.004, .045] | 1.366 | .172 | .017 | .014 | [-.017, .029] | 0.462 | .645 | -.014 | .014 | [-.028, .017] | -0.401 | .688 |
| Relationship status (married) |  |  |  |  |  | -.027 | .072 | [-.171, .066] | -0.732 | .464 | -.032 | .070 | [-.178, .052] | -0.907 | .365 |
| Parent status (parent) |  |  |  |  |  | **.418** | .070 | [.648, .880] | 10.874 | <.001 | **.373** | .070 | [.568, .797] | 9.812 | <.001 |
| Employment status (full-time) |  |  |  |  |  | -.033 | .104 | [-.267, .076] | -0.921 | .357 | -.022 | .101 | [-.228, .104] | -0.615 | .539 |
| Neuroticism |  |  |  |  |  |  |  |  |  |  | **.202** | .050 | [.145, .310] | 4.520 | <.001 |
| Extraversion |  |  |  |  |  |  |  |  |  |  | **.234** | .055 | [.228, .410] | 5.764 | <.001 |
| Openness |  |  |  |  |  |  |  |  |  |  | **-.116** | .043 | [-.215, -.072] | -3.304 | .001 |
| Agreeableness |  |  |  |  |  |  |  |  |  |  | .028 | .061 | [-.056, .147] | 0.743 | .458 |
| Conscientiousness |  |  |  |  |  |  |  |  |  |  | **.116** | .055 | [.074, .256] | 3.000 | .003 |
| Model *R2* | .002 | | | | | .144 | | | | | .205 | | | | |
| F(4,709) | 1.340 | | | | | 18.060 | | | | | 16.320 | | | | |
| *p* | .254 | | | | | <.001 | | | | | <.001 | | | | |

*Note: β = standardised beta coefficient*

## Table S8. CARES Cognitive Maturity

|  | Model 1 | | | | | Model 2 | | | | | Model 3 | | | | |
| --- | --- | --- | --- | --- | --- | --- | --- | --- | --- | --- | --- | --- | --- | --- | --- |
|  | *β* | SE | 95% CI% | *t* | *p* | *β* | SE | 95% CI% | *t* | *p* | *β* | SE | 95% CI% | *t* | *p* |
| Intercept | - | .159 | [3.258, 3.782] | 22.145 | <.001 | - | .171 | [3.233, 3.796] | 20.552 | <.001 | - | .352 | [1.193, 2.354] | 5.032 | <.001 |
| Age | .003 | .002 | [-.003, .003] | 0.066 | .947 | -.003 | .002 | [-.004, .004] | -0.074 | .941 | -.008 | .002 | [-.004, .004] | -0.170 | .865 |
| Gender (female) | .072 | .051 | [.013, .181] | 1.904 | .057 | .071 | .052 | [.011, .180] | 1.851 | .065 | .028 | .052 | [-.047, .122] | 0.727 | .468 |
| Highest education | .018 | .025 | [-.029, .053] | 0.488 | .626 | .019 | .025 | [-.029, .054] | 0.484 | .629 | -.023 | .025 | [-.056, .026] | -0.607 | .544 |
| Log income | -.020 | .011 | [-.024, .012] | -0.521 | .602 | -.022 | .011 | [-.025, .012] | -0.571 | .568 | -.047 | .010 | [-.031, .005] | -1.228 | .220 |
| Relationship status (married) |  |  |  |  |  | .002 | .057 | [-.091, .098] | 0.060 | .952 | -.006 | .055 | [-.100, .082] | -0.165 | .869 |
| Parent status (parent) |  |  |  |  |  | .013 | .056 | [-.074, .110] | 0.318 | .750 | .001 | .055 | [-.089, .092] | 0.033 | .974 |
| Employment status (full-time) |  |  |  |  |  | -.009 | .083 | [-.155, .118] | -0.219 | .826 | .005 | .080 | [-.121, .142] | .0132 | .895 |
| Neuroticism |  |  |  |  |  |  |  |  |  |  | .069 | .040 | [-.008, .123] | 1.437 | .151 |
| Extraversion |  |  |  |  |  |  |  |  |  |  | **.150** | .048 | [.079, .223] | 3.442 | .001 |
| Openness |  |  |  |  |  |  |  |  |  |  | **.098** | .034 | [.033, .146] | 2.607 | .009 |
| Agreeableness |  |  |  |  |  |  |  |  |  |  | .053 | .049 | [-.016, .144] | 1.321 | .187 |
| Conscientiousness |  |  |  |  |  |  |  |  |  |  | **.229** | .044 | [.169, .312] | 5.527 | <.001 |
| Model *R2* | .000 | | | | | -.004 | | | | | .081 | | | | |
| F(4,709) | 1.066 | | | | | 0.629 | | | | | 6.208 | | | | |
| *p* | .372 | | | | | .733 | | | | | <.001 | | | | |

*Note: β = standardised beta coefficient*

## Table S9. CARES Sense of Aging

|  | Model 1 | | | | | Model 2 | | | | | Model 3 | | | | |
| --- | --- | --- | --- | --- | --- | --- | --- | --- | --- | --- | --- | --- | --- | --- | --- |
|  | *β* | SE | 95% CI% | *t* | *p* | *β* | SE | 95% CI% | *t* | *p* | *β* | SE | 95% CI% | *t* | *p* |
| Intercept | - | .178 | [3.047, 3.632] | 18.779 | <.001 | - | .191 | [2.944, 3.574] | 17.060 | <.001 | - | .402 | [0.675, 2.000] | 3.327 | .001 |
| Age | .059 | .002 | [-.000, .007] | 1.531 | .126 |  | .003 | [-.002, .007] | 0.960 | .338 | .056 | .003 | [-.001, .008] | 1.180 | .238 |
| Gender (female) | .028 | .057 | [-051, .136] | 0.751 | .453 |  | .058 | [-.064, .126] | 0.543 | .587 | -.032 | .059 | [-.146, .048] | -0.826 | .409 |
| Highest education | -.039 | .028 | [-.074, .017] | -1.044 | .297 |  | .028 | [-.070, .022] | -0.848 | .397 | -.058 | .028 | [-.089, .004] | -1.513 | .131 |
| Log income | .041 | .012 | [-.007, .033] | 1.061 | .289 |  | .012 | [-.009, .032] | 0.899 | .369 | .026 | .012 | [-.012, .028] | 0.662 | .508 |
| Relationship status (married) |  |  |  |  |  |  | .064 | [-.081, .130] | 0.380 | .704 | .009 | .063 | [-.089, .118] | 0.228 | .820 |
| Parent status (parent) |  |  |  |  |  |  | .063 | [-.015, .191] | 1.412 | .158 | .048 | .063 | [-.031, .176] | 1.155 | .248 |
| Employment status (full-time) |  |  |  |  |  |  | .093 | [-.140, .165] | 0.135 | .892 | .017 | .091 | [-.110, .190] | 0.436 | .663 |
| Neuroticism |  |  |  |  |  |  |  |  |  |  | **.134** | .045 | [.049, .199] | 2.727 | .007 |
| Extraversion |  |  |  |  |  |  |  |  |  |  | **.131** | .050 | [.065, .230] | 2.954 | .003 |
| Openness |  |  |  |  |  |  |  |  |  |  | .074 | .039 | [.011, .140] | 1.928 | .054 |
| Agreeableness |  |  |  |  |  |  |  |  |  |  | **.101** | .056 | [.045, .228] | 2.453 | .014 |
| Conscientiousness |  |  |  |  |  |  |  |  |  |  | **.132** | .050 | [.073, .237] | 3.114 | .002 |
| Model *R2* | .002 | | | | | .001 | | | | | .046 | | | | |
| F(4,709) | 1.435 | | | | | 1.121 | | | | | 3.835 | | | | |
| *p* | .221 | | | | | .348 | | | | | <.001 | | | | |

*Note: β = standardised beta coefficient*

## Table S10. CARES Self Reliance

|  | Model 1 | | | | | Model 2 | | | | | Model 3 | | | | |
| --- | --- | --- | --- | --- | --- | --- | --- | --- | --- | --- | --- | --- | --- | --- | --- |
|  | *β* | SE | 95% CI% | *t* | *p* | *β* | SE | 95% CI% | *t* | *p* | *β* | SE | 95% CI% | *t* | *p* |
| Intercept | - | .179 | [3.227, 3.815] | 19.725 | <.001 | - | .192 | [3.232, 3.865] | 18.483 | <.001 | - | .401 | [1.269, 2.592] | 4.810 | <.001 |
| Age | -.032 | -.002 | [-.006, .002] | -0.830 | .407 | -.019 | .003 | [-.005, .003] | -0.445 | .656 | -.026 | .003 | [-.006, .003] | -0.539 | .590 |
| Gender (female) | **.097** | .057 | [.054, .242] | 2.587 | .010 | **.010** | .058 | [.056, .247] | 2.618 | .009 | .061 | .059 | [-.005, .189] | 1.570 | .117 |
| Highest education | -.025 | .028 | [-.064, .027] | -0.654 | .514 | -.028 | .028 | [-.068, .025] | -0.755 | .451 | -.057 | .028 | [-.088, .005] | -1.483 | .138 |
| Log income | .003 | .012 | [-.019, .021] | 0.067 | .947 | .003 | .012 | [-.020, .021] | 0.070 | .944 | -.020 | .012 | [-.026, .014] | -0.515 | .607 |
| Relationship status (married) |  |  |  |  |  | .013 | .064 | [-.084, .128] | 0.341 | .733 | .007 | .063 | [-.091, .116] | 0.196 | .845 |
| Parent status (parent) |  |  |  |  |  | -.026 | .063 | [-.143, .064] | -0.622 | .534 | -.038 | .063 | [-.161, .045] | -0.922 | .357 |
| Employment status (full-time) |  |  |  |  |  | -.006 | .093 | [-.168, .138] | -0.160 | .873 | .006 | .091 | [-.136, .163] | 0.150 | .881 |
| Neuroticism |  |  |  |  |  |  |  |  |  |  | .059 | .045 | [-.020, .130] | 1.214 | .225 |
| Extraversion |  |  |  |  |  |  |  |  |  |  | **.113** | .050 | [.046, .211] | 2.575 | .010 |
| Openness |  |  |  |  |  |  |  |  |  |  | .046 | .039 | [-.017, .111] | 1.201 | .230 |
| Agreeableness |  |  |  |  |  |  |  |  |  |  | .065 | .055 | [-.003, .180] | 1.593 | .112 |
| Conscientiousness |  |  |  |  |  |  |  |  |  |  | **.202** | .050 | [.156, .320] | 4.799 | <.001 |
| Model *R2* | .006 | | | | | .003 | | | | | .060 | | | | |
| F(4,709) | 2.081 | | | | | 1.265 | | | | | 4.784 | | | | |
| *p* | .082 | | | | | .265 | | | | | <.001 | | | | |

*Note: β = standardised beta coefficient*

## Table S11. CARES Eudaimonia

|  | Model 1 | | | | | Model 2 | | | | | Model 3 | | | | |
| --- | --- | --- | --- | --- | --- | --- | --- | --- | --- | --- | --- | --- | --- | --- | --- |
|  | *β* | SE | 95% CI% | *t* | *p* | *β* | SE | 95% CI% | *t* | *p* | *β* | SE | 95% CI% | *t* | *p* |
| Intercept | - | .170 | [3.103, 3.662] | 19.948 | <.001 | - | .182 | [3.077, 3.678] | 18.519 | <.001 | - | .378 | [1.336, 2.581] | 5.182 | <.001 |
| Age | -.074 | .002 | [-.008, -.001] | -1.950 | .052 | -.068 | .002 | [-.008, .000] | -1.582 | .114 | -.057 | .003 | [-.007, .001] | -1.217 | .224 |
| Gender (female) | **.168** | .054 | [.156, .334] | 4.515 | <.001 | **.168** | .055 | [.155, .336] | 4.460 | <.001 | **.139** | .055 | [.112, .294] | 3.663 | <.001 |
| Highest education | -.022 | .026 | [-.059, .028] | -0.593 | .553 | -.021 | .027 | [-.059, .029] | -0.567 | .571 | -.062 | .027 | [-.087, -.000] | -1.648 | .100 |
| Log income | .017 | .012 | [-.014, .024] | 0.435 | .663 | .019 | .012 | [-.014, .025] | 0.477 | .633 | -.009 | .012 | [-.022, .016] | -0.248 | .804 |
| Relationship status (married) |  |  |  |  |  | .002 | .061 | [-.097, .104] | 0.055 | .956 | -.012 | .059 | [-.115, .079] | -0.308 | .758 |
| Parent status (parent) |  |  |  |  |  | -.009 | .060 | [-.112, .085] | -0.222 | .824 | -.035 | .059 | [-.148, .046] | -0.865 | .387 |
| Employment status (full-time) |  |  |  |  |  | .012 | .088 | [-.118, .173] | 0.311 | .756 | .027 | .086 | [-.078, .204] | 0.739 | .460 |
| Neuroticism |  |  |  |  |  |  |  |  |  |  | .029 | .043 | [-.044, .097] | 0.616 | .538 |
| Extraversion |  |  |  |  |  |  |  |  |  |  | **.198** | .047 | [.139, .294] | 4.602 | <.001 |
| Openness |  |  |  |  |  |  |  |  |  |  | **.074** | .067 | [.012, .134] | 1.984 | .048 |
| Agreeableness |  |  |  |  |  |  |  |  |  |  | .005 | .052 | [-.080, .092] | 0.119 | .905 |
| Conscientiousness |  |  |  |  |  |  |  |  |  |  | **.168** | .047 | [.114, .268] | 4.085 | <.001 |
| Model *R2* | .031 | | | | | .027 | | | | | .099 | | | | |
| F(4,709) | 6.613 | | | | | 3.784 | | | | | 7.532 | | | | |
| *p* | <.001 | | | | | <.001 | | | | | <.001 | | | | |

*Note: β = standardised beta coefficient*

## Table S12. CARES Social Convoy

|  | Model 1 | | | | | Model 2 | | | | | Model 3 | | | | |
| --- | --- | --- | --- | --- | --- | --- | --- | --- | --- | --- | --- | --- | --- | --- | --- |
|  | *β* | SE | 95% CI% | *t* | *p* | *β* | SE | 95% CI% | *t* | *p* | *β* | SE | 95% CI% | *t* | *p* |
| Intercept | - | .179 | [2.918, 3.508] | 17.925 | <.001 | - | .193 | [2.810, 3.444] | 16.237 | <.001 | - | .391 | [0.314, 1.602] | 2.452 | .014 |
| Age | **-.123** | .002 | [-.011, -.004] | -3.229 | .001 | **-.124** | .002 | [-.011, -.003] | -2.895 | .004 | -.033 | .003 | [-.006, .002] | -0.730 | .466 |
| Gender (female) | **.166** | .057 | [.164, .353] | 4.505 | <.001 | **.160** | .058 | [.153, .344] | 4.258 | <.001 | **.101** | .057 | [.063, .251] | 2.741 | .006 |
| Highest education | -.007 | .028 | [-.051, .040] | -0.198 | .843 | .001 | .028 | [-.046, .047] | 0.026 | .979 | -.022 | .027 | [-.062, .028] | -0.615 | .539 |
| Log income | .030 | .012 | [-.010, .030] | 0.796 | .426 | .031 | .013 | [-.011, .031] | 0.804 | .422 | -.005 | .012 | [-.021, .018] | -0.133 | .894 |
| Relationship status (married) |  |  |  |  |  | .011 | .065 | [-.088, .125] | 0.285 | .776 | -.006 | .061 | [-.111, .090] | -0.176 | .860 |
| Parent status (parent) |  |  |  |  |  | .029 | .063 | [-.058, .150] | 0.724 | .469 | -.026 | .061 | [-.141, .060] | -0.659 | .510 |
| Employment status (full-time) |  |  |  |  |  | .039 | .093 | [-.060, .248] | 1.007 | .314 | .059 | .088 | [-.001, .290] | 1.637 | .102 |
| Neuroticism |  |  |  |  |  |  |  |  |  |  | **.175** | .044 | [.093, .239] | 3.761 | <.001 |
| Extraversion |  |  |  |  |  |  |  |  |  |  | **.346** | .049 | [.320, .481] | 8.240 | <.001 |
| Openness |  |  |  |  |  |  |  |  |  |  | -.006 | .038 | [-.069, .057] | -0.155 | .877 |
| Agreeableness |  |  |  |  |  |  |  |  |  |  | .016 | .054 | [-.067, .111] | 0.406 | .685 |
| Conscientiousness |  |  |  |  |  |  |  |  |  |  | **.133** | .048 | [.080, .239] | 3.311 | .001 |
| Model *R2* | .040 | | | | | .038 | | | | | .146 | | | | |
| F(4,709) | 8.484 | | | | | 5.068 | | | | | 11.150 | | | | |
| *p* | <.001 | | | | | <.001 | | | | | <.001 | | | | |

*Note: β = standardised beta coefficient*
